# Supplementary material
Source: HighWire-hosted journal article supplement (https://bmjopen.bmj.com/content/7/1/e013629)
Supplement: inline-supplementary-material-1 [file inline-supplementary-material-1.pdf]

Appendix 1. Age standardized prevalence of comorbid conditions per 10 000 inhabitants with 95% confidence intervals in the Tromsø study cohorts

| Comorbid conditions          | Assigned weight <sup>a</sup> | Tromsø 4 (1994/5) |               | Tromsø 5 (2001) |               | Tromsø 6 (2007/8) |               |
|------------------------------|------------------------------|-------------------|---------------|-----------------|---------------|-------------------|---------------|
|                              |                              | Rate              | 95% CI        | Rate            | 95% CI        | Rate              | 95% CI        |
| Chronic bronchitis           | 1                            | 688               | (652 - 724)   | 318             | (279 - 358)   | 316               | (286 - 346)   |
| Migraine                     | 1                            | 1464              | (1415 - 1513) | 1386            | (1255 - 1518) | 1237              | (1159 - 1315) |
| Gastric or ventricular ulcer | 2                            | 723               | (682 - 764)   | 750             | (671 - 829)   | 596               | (552 - 640)   |
| Asthma                       | 2                            | 677               | (639 - 715)   | 754             | (656 - 852)   | 836               | (777 - 895)   |
| Thyroid disease              | 2                            | 370               | (340 - 400)   | 547             | (478 - 617)   | 695               | (647 - 743)   |
| <i>Arthritis<sup>b</sup></i> | 2                            | 2799              | (2594 - 3004) | 2729            | (2532 - 2926) | 2073              | (1916 - 2229) |
| Myocardial infarction        | 2                            | 165               | (144 - 187)   | 191             | (163 - 219)   | 192               | (169 - 215)   |
| Cerebrovascular stroke       | 2                            | 368               | (336 - 400)   | 358             | (318 - 398)   | 383               | (353 - 414)   |
| Diabetes (T1 or T2)          | 2                            | 208               | (184 - 231)   | 287             | (237 - 336)   | 372               | (336 - 407)   |
| Osteoporosis                 | 3                            | 177               | (154 - 200)   | 207             | (179 - 234)   | 287               | (260 - 315)   |
| Angina                       | 3                            | 457               | (431 - 483)   | 349             | (318 - 380)   | 320               | (293 - 347)   |

<sup>a</sup> Assigned weights for each condition the participant has according to the Health Impact Index that are used to measure comorbidity. The total equals the score, e.g. a patient with angina (3) and diabetes (2) will have a full contextual score of 3+2=5.

<sup>b</sup> Includes only subjects above 70 years of age.

Appendix 2. Regression coefficients with bias corrected standard errors for mediated effect of age on self-reported health. Confidence intervals and standard errors are based on 1000 bootstrap samples.

| <b>Consequent 1994</b>                |                                |        |                      |                                        |                           |            |                      |                                         |                                        |            |                      |           |
|---------------------------------------|--------------------------------|--------|----------------------|----------------------------------------|---------------------------|------------|----------------------|-----------------------------------------|----------------------------------------|------------|----------------------|-----------|
| <i>Antecedent</i>                     | <i>M1 (Medical conditions)</i> |        |                      |                                        | <i>M2 (Mental health)</i> |            |                      |                                         | <i>REACTION (Self-reported health)</i> |            |                      |           |
|                                       |                                | Coeff. | [95% Conf. Interval] |                                        |                           | Coeff.     | [95% Conf. Interval] |                                         |                                        | Coeff.     | [95% Conf. Interval] |           |
| <i>Constant</i>                       | $i_{M1}$                       | -0.733 | -0.810               | -0.656                                 | $i_{M2}$                  | 1.48526    | 1.467446             | 1.503073                                | $i_y$                                  | 4.421846   | 4.382292             | 4.461401  |
| <i>X (Age)</i>                        | $a_1$                          | 0.0390 | 0.037                | 0.041                                  | $a_2$                     | 0.000      | -0.000315            | 0.0004202                               | $c'$                                   | -0.014     | -0.014472            | -0.013333 |
| <i>M1 (Medical condition)</i>         | ---                            | ---    | ---                  | $d_{12}$                               | 0.0297326                 | 0.0262572  | 0.033208             | $b_1$                                   | -0.0704918                             | -0.074957  | -0.066027            |           |
| <i>M2 (Mental health)</i>             | ---                            | ---    | ---                  | ---                                    | ---                       | ---        | ---                  | $b_2$                                   | -0.5594842                             | -0.57862   | -0.540348            |           |
| R-squared = 0.1002                    |                                |        |                      | R-squared = 0.0169                     |                           |            |                      | R-squared = 0.2882                      |                                        |            |                      |           |
| Wald $\chi^2(1) = 1826.35$ $p < .001$ |                                |        |                      | Wald $\chi^2(2) = 309.30$ , $p < .001$ |                           |            |                      | Wald $\chi^2(3) = 8907.28$ , $p < .001$ |                                        |            |                      |           |
| <b>Consequent 2001</b>                |                                |        |                      |                                        |                           |            |                      |                                         |                                        |            |                      |           |
| <i>Antecedent</i>                     | <i>M1 (Medical conditions)</i> |        |                      |                                        | <i>M2 (Mental health)</i> |            |                      |                                         | <i>REACTION (Self-reported health)</i> |            |                      |           |
|                                       |                                | Coeff. | [95% Conf. Interval] |                                        |                           | Coeff.     | [95% Conf. Interval] |                                         |                                        | Coeff.     | [95% Conf. Interval] |           |
| <i>Constant</i>                       | $i_{M1}$                       | -1.520 | -1.677               | -1.363                                 | $i_{M2}$                  | 1.341679   | 1.304584             | 1.378773                                | $i_y$                                  | 4.217373   | 4.13278              | 4.301967  |
| <i>X (Age)</i>                        | $a_1$                          | 0.0551 | 0.052                | 0.058                                  | $a_2$                     | -0.003     | -0.003269            | -0.0020216                              | $c'$                                   | -0.010     | -0.011255            | -0.009182 |
| <i>M1 (Medical condition)</i>         | ---                            | ---    | ---                  | $d_{12}$                               | 0.0378559                 | 0.03291    | 0.0428018            | $b_1$                                   | -0.0772212                             | -0.084309  | -0.070134            |           |
| <i>M2 (Mental health)</i>             | ---                            | ---    | ---                  | ---                                    | ---                       | ---        | ---                  | $b_2$                                   | -0.6020822                             | -0.644952  | -0.559213            |           |
| R-squared = 0.1180                    |                                |        |                      | R-squared = 0.0451                     |                           |            |                      | R-squared = 0.2734                      |                                        |            |                      |           |
| Wald $\chi^2(1) = 1339.28$ $p < .001$ |                                |        |                      | Wald $\chi^2(2) = 239.84$ , $p < .001$ |                           |            |                      | Wald $\chi^2(3) = 2295.51$ , $p < .001$ |                                        |            |                      |           |
| <b>Consequent 2007/8</b>              |                                |        |                      |                                        |                           |            |                      |                                         |                                        |            |                      |           |
| <i>Antecedent</i>                     | <i>M1 (Medical conditions)</i> |        |                      |                                        | <i>M2 (Mental health)</i> |            |                      |                                         | <i>REACTION (Self-reported health)</i> |            |                      |           |
|                                       |                                | Coeff. | [95% Conf. Interval] |                                        |                           | Coeff.     | [95% Conf. Interval] |                                         |                                        | Coeff.     | [95% Conf. Interval] |           |
| <i>Constant</i>                       | $i_{M1}$                       | -2.020 | -2.194               | -1.847                                 | $i_{M2}$                  | 1.425522   | 1.388859             | 1.462185                                | $i_y$                                  | 5.278      | 5.197401             | 5.358518  |
| <i>X (Age)</i>                        | $a_1$                          | 0.0627 | 0.059                | 0.066                                  | $a_2$                     | -0.0034595 | -0.004095            | -0.0028236                              | $c'$                                   | -0.0075404 | -0.00861             | -0.006471 |
| <i>M1 (Medical condition)</i>         | ---                            | ---    | ---                  | $d_{12}$                               | 0.0409442                 | 0.0366294  | 0.0452591            | $b_1$                                   | -0.0843211                             | -0.091595  | -0.077048            |           |
| <i>M2 (Mental health)</i>             | ---                            | ---    | ---                  | ---                                    | ---                       | ---        | ---                  | $b_2$                                   | -0.7412179                             | -0.77872   | -0.703716            |           |
| R-squared = 0.1229                    |                                |        |                      | R-squared = 0.0471                     |                           |            |                      | R-squared = 0.2529                      |                                        |            |                      |           |
| Wald $\chi^2(1) = 1501.87$ $p < .001$ |                                |        |                      | Wald $\chi^2(2) = 358.15$ $p < .001$   |                           |            |                      | Wald $\chi^2(3) = 3165.11$ , $p < .001$ |                                        |            |                      |           |
